# Supplementary material for: Limonoids from the root bark of Dictamnus angustifolius: potent neuroprotective agents with biometal chelation and halting copper redox cycling properties
Source: Royal Society of Chemistry journal article supplement (doi:10.1039/c5ra00278h), 2015-01-01
Supplement: c5ra00278h1.pdf [file c5ra00278h1.pdf]

## Electronic Supplementary Information

### **Limonoids from the root bark of *Dictamnus angustifolius*: potent neuroprotective agent with biometal chelation, halting copper redox cycling properties**

Jian-Bo Sun,<sup>a,1</sup> Neng Jiang,<sup>a,1</sup> Meng-Ying Lv,<sup>b</sup> Pei Wang,<sup>c</sup> Feng-Guo Xu,<sup>b</sup> Jing-Yu Liang,<sup>\*a</sup>

Wei Qu<sup>\*\*a</sup>

<sup>a</sup> *Department of Natural Medicinal Chemistry, China Pharmaceutical University, Nanjing 210009, China*

<sup>b</sup> *Key Laboratory of Drug Quality Control and Pharmacovigilance (Ministry of Education), China Pharmaceutical University, Nanjing 210009, China*

<sup>c</sup> *Center of Excellence in Post-Harvest Technologies, North Carolina Agricultural and Technical State University, North Carolina Research Campus, Kannapolis 28081, North Carolina, United State of America*

\*Corresponding author: Jingyu Liang

Department of Natural Medicinal Chemistry, China Pharmaceutical University, #24 Tongjiaxiang Nanjing 210009, P. R. China

Tel: +86 13605154996,

E-mail address: [jyliang08@126.com](mailto:jyliang08@126.com).

\*\*Corresponding author: Wei Qu

Department of Natural Medicinal Chemistry, China Pharmaceutical University, #24 Tongjiaxiang Nanjing 210009, P. R. China

Tel: +86 13852294378,

E-mail address: [popoqzh@126.com](mailto:popoqzh@126.com).

<sup>1</sup> These authors contributed equally to this work and should be regarded as co-first authors.

## Table of Contents

- S1.**  $^1\text{H}$  NMR spectrum of compound **1** (500 MHz,  $\text{CDCl}_3$ )
- S2.**  $^{13}\text{C}$  NMR spectrum of compound **1** (75 MHz,  $\text{CDCl}_3 + \text{CD}_3\text{OD}$ )
- S3.**  $^1\text{H}$  NMR spectrum of compound **2** (500 MHz,  $\text{CDCl}_3$ )
- S4.**  $^{13}\text{C}$  NMR spectrum of compound **2** (125 MHz,  $\text{CDCl}_3$ )
- S5.** HSQC spectrum of compound **2**
- S6.** HMBC spectrum of compound **2**
- S7.** ROESY spectrum of compound **2**
- S8.**  $^1\text{H}$  NMR spectrum of compound **3** (500 MHz,  $\text{CD}_3\text{COCD}_3$ )
- S9.**  $^{13}\text{C}$  NMR spectrum of compound **3** (125 MHz,  $\text{CD}_3\text{COCD}_3$ )
- S10.** HSQC spectrum of compound **3**
- S11.** HMBC spectrum of compound **3**
- S12.** ROESY spectrum of compound **3**
- S13.**  $^1\text{H}$  NMR spectrum of compound **4** (300 MHz,  $\text{CDCl}_3$ )
- S14.**  $^{13}\text{C}$  NMR spectrum of compound **4** (75 MHz,  $\text{CDCl}_3$ )
- S15.** HMBC spectrum of compound **4**
- S16.**  $^1\text{H}$  NMR spectrum of compound **5** (500 MHz,  $\text{CDCl}_3$ )
- S17.**  $^{13}\text{C}$  NMR spectrum of compound **5** (125 MHz,  $\text{CDCl}_3$ )
- S18.** HSQC spectrum of compound **5**
- S19.** HMBC spectrum of compound **5**
- S20.** ROESY spectrum of compound **5**
- S21.**  $^1\text{H}$  NMR spectrum of compound **6** (300 MHz,  $\text{CDCl}_3$ )
- S22.**  $^{13}\text{C}$  NMR spectrum of compound **6** (75 MHz,  $\text{CDCl}_3$ )

- S23.** HMBC spectrum of compound **6**
- S24.** ROESY spectrum of compound **6**
- S25.**  $^1\text{H}$  NMR spectrum of compound **7** (500 MHz,  $\text{CDCl}_3$ )
- S26.**  $^{13}\text{C}$  NMR spectrum of compound **7** (125 MHz,  $\text{CDCl}_3$ )
- S27.** HSQC spectrum of compound **7**
- S28.** HMBC spectrum of compound **7**
- S29.** ROESY spectrum of compound **7**
- S30.**  $^1\text{H}$  NMR spectrum of compound **8** (300 MHz,  $\text{CDCl}_3$ )
- S31.**  $^1\text{H}$  NMR spectrum of compound **9** (500 MHz,  $\text{CDCl}_3$ )
- S32.**  $^1\text{H}$  NMR spectrum of compound **10** (300 MHz,  $\text{CDCl}_3$ )

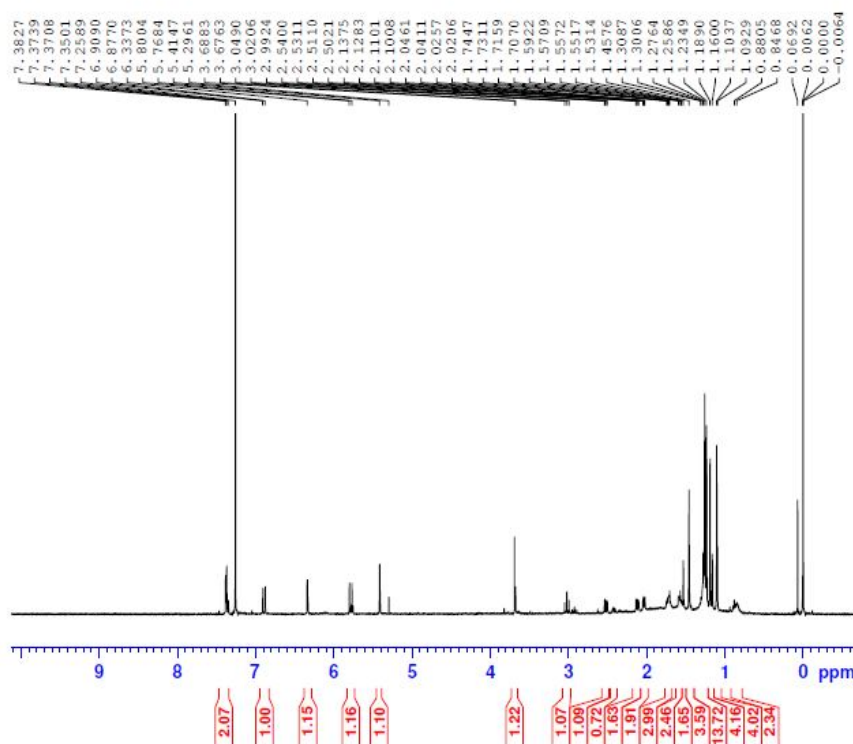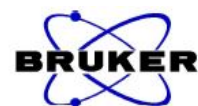

|         |                |       |  |
|---------|----------------|-------|--|
| NAME    | 1jy-500M       |       |  |
| EXPNO   | 261            |       |  |
| PROCNO  | 1              |       |  |
| Date_   | 20120531       |       |  |
| Time    | 23.31          |       |  |
| INSTRUM | av300          |       |  |
| PROBHD  | 5 mm QNP       | 1H/15 |  |
| PULPROG | zg30           |       |  |
| TD      | 32768          |       |  |
| SOLVENT | CDCl3          |       |  |
| NS      | 8              |       |  |
| DS      | 6              |       |  |
| SWH     | 10000.000 Hz   |       |  |
| FIDRES  | 0.305176 Hz    |       |  |
| AQ      | 1.6385000 sec  |       |  |
| RG      | 32             |       |  |
| DW      | 50.000 usec    |       |  |
| DE      | 6.50 usec      |       |  |
| TE      | 303.0 K        |       |  |
| D1      | 1.00000000 sec |       |  |
| TD0     | 1              |       |  |

```
===== CHANNEL F1 =====
NUC1                1H
P1                  14.80 usec
PL1                 -1.00 dB
PL1W                14.32511806 W
SFO1                500.1340010 MHz
SI                  32768
SF                  500.1300134 MHz
WDW                  EM
SSB                  0
LB                   0.10 Hz
GB                   0
PC                   1.00
```

**S1.** <sup>1</sup>H NMR spectrum of compound **1** (500 MHz, CDCl<sub>3</sub>)

DA-14 <sup>13</sup>C-NMR CDCL<sub>3</sub>+CD<sub>3</sub>OD 300K AV-300

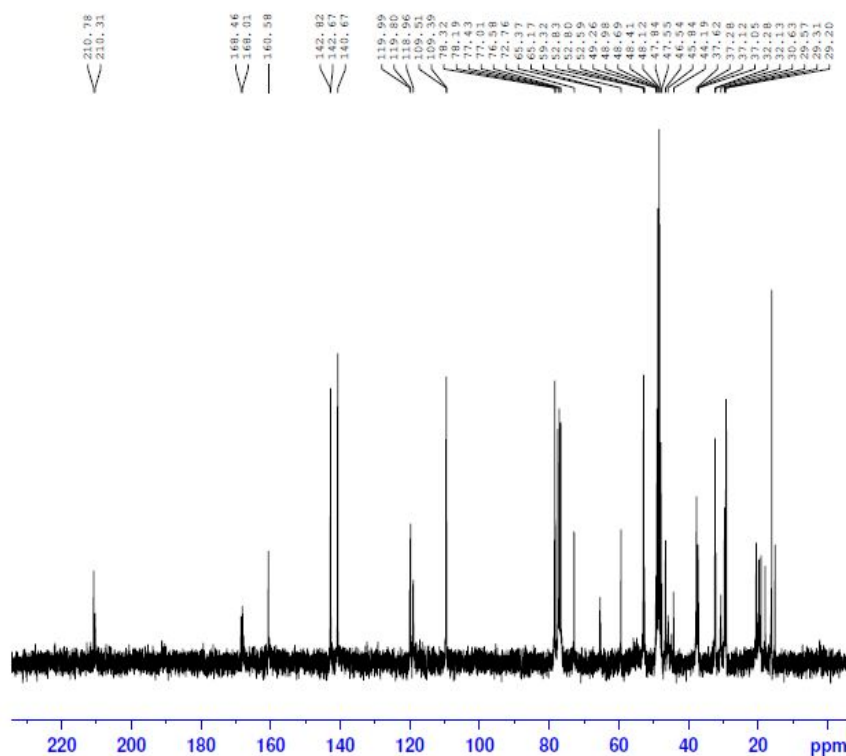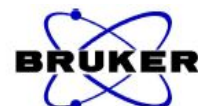

```
NAME          1jy-300M
EXPNO         1150
PROCNO        1
Data_         20130129
Time          15.17
INSTRUM       av300
PROBHD        5 mm QNPW 5w1
PULPRG        gpc
TD            32768
SOLVENT       CDCl3
NS            3036
DS           1815.94 Hz
SWH           0.552855 MHz
FIDRES        0.90444668 sec
AQ            102400
RG            27.600
DE            6.00 usecs
DW            300.0 K
TE            0.13000000 sec
D1            0.20000000 sec
d11           0.03000000 sec
```

```
===== CHANNEL f1 =====
NUC1          13C
P1             6.20 usec
PL1           -5.00 dB
SFO1          75.4763978 MHz
```

```
===== CHANNEL f2 =====
CPDPRG2          waltz16
NUC2              1H
PCPD2            80.00 usec
PL2              -2.00 dB
PL12             18.00 dB
SF02             300.1312005 MHz
SI               32768
SF               75.4677678 MHz
WDW              EM
SSB              0
LB               1.00 Hz
GB               0
PC               0.50
```

**S2.**  $^{13}\text{C}$  NMR spectrum of compound **1** (75 MHz,  $\text{CDCl}_3 + \text{CD}_3\text{OD}$ )

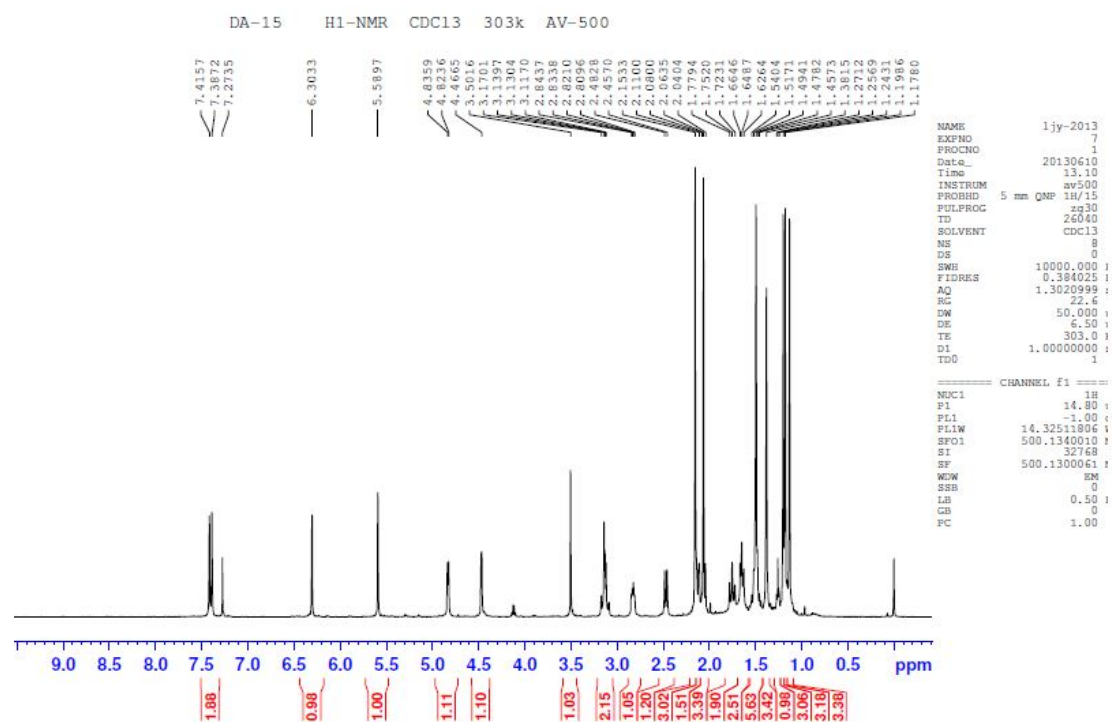

S3.  $^1\text{H}$  NMR spectrum of compound **2** (500 MHz,  $\text{CDCl}_3$ )

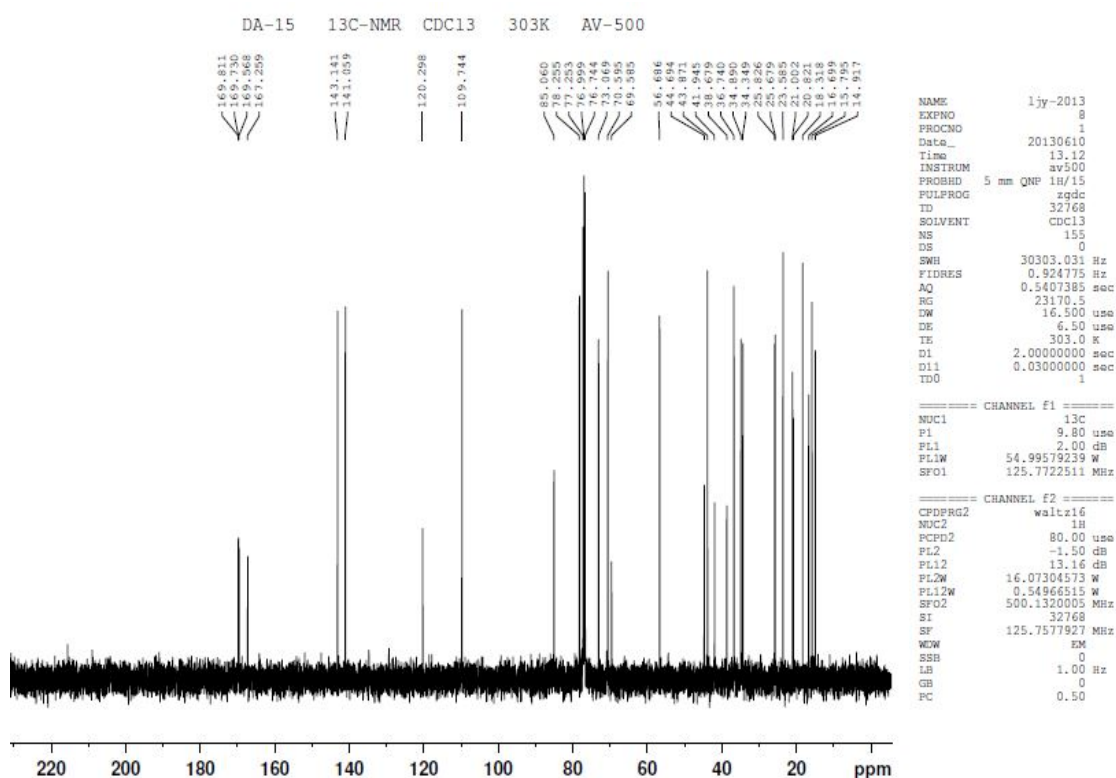

S4.  $^{13}\text{C}$  NMR spectrum of compound **2** (125 MHz,  $\text{CDCl}_3$ )

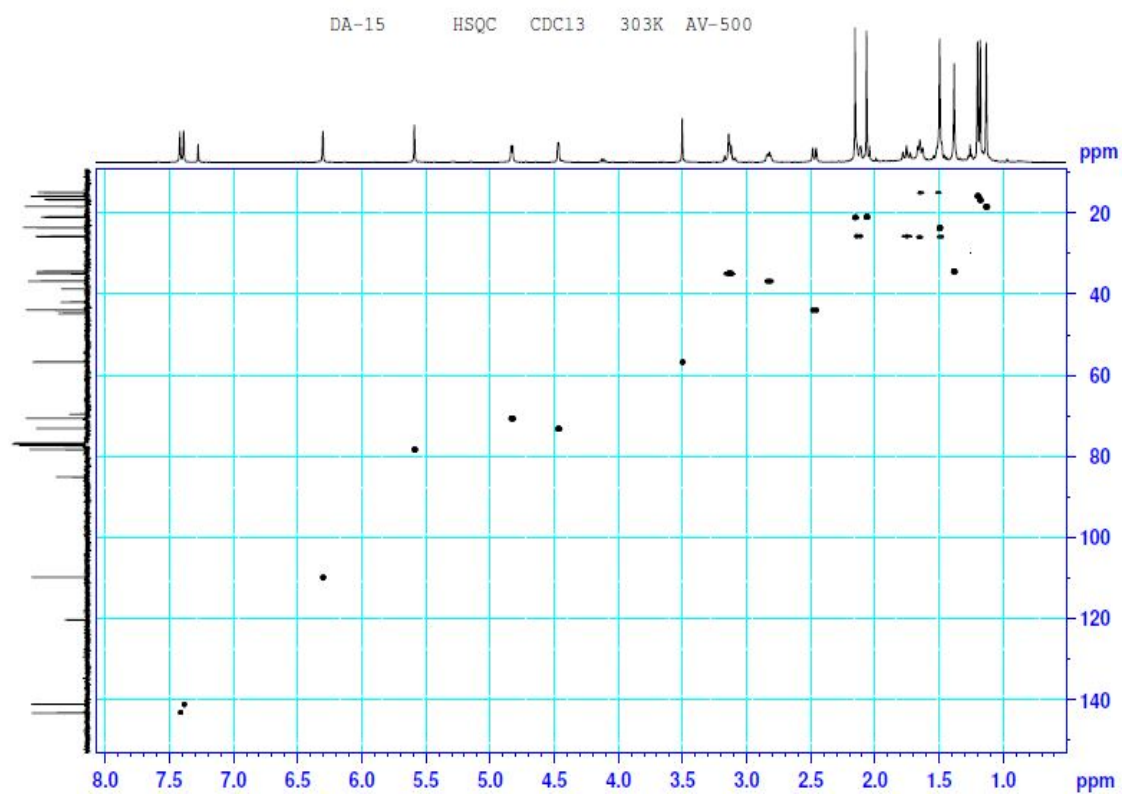

S5. HSQC spectrum of compound **2**

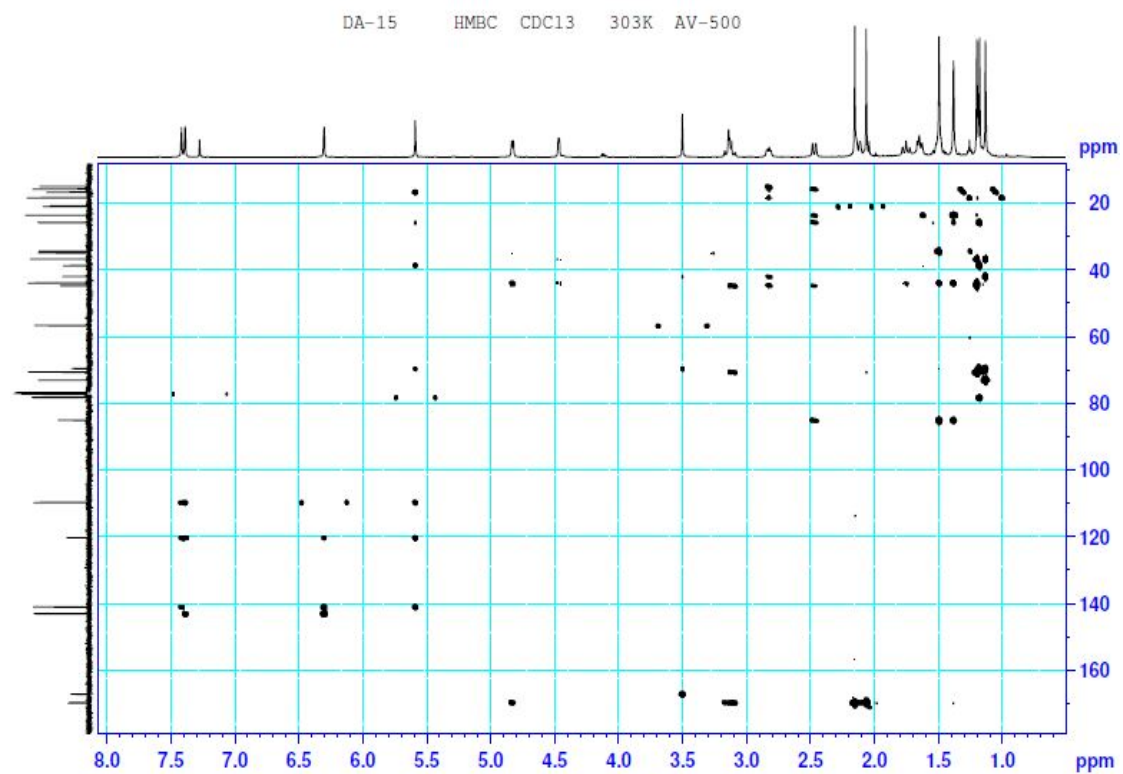

S6. HMBC spectrum of compound **2**

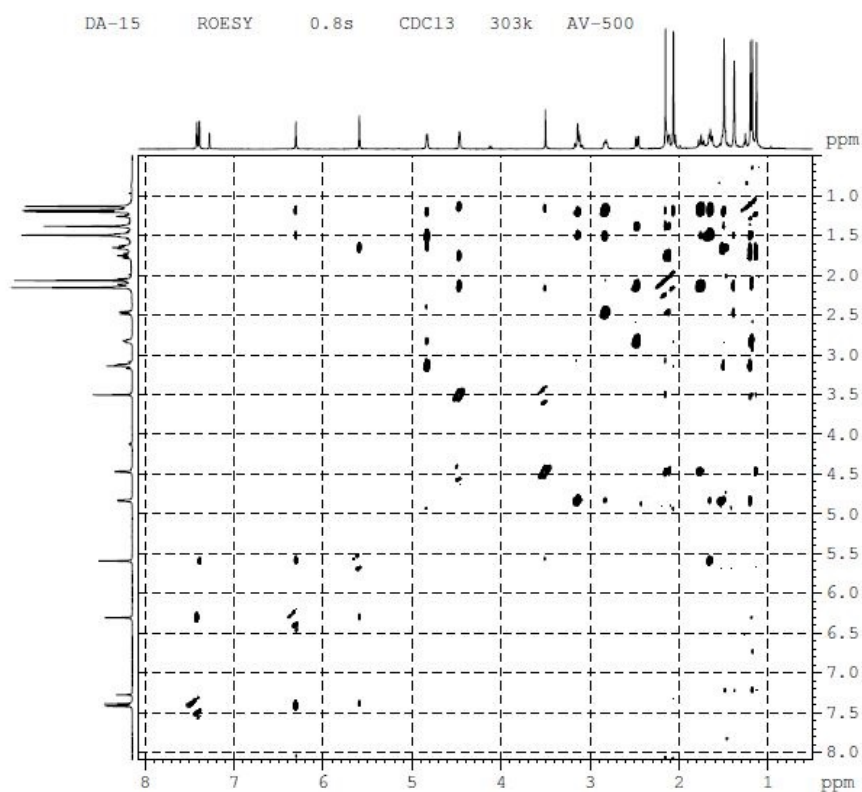

S7. ROESY spectrum of compound 2

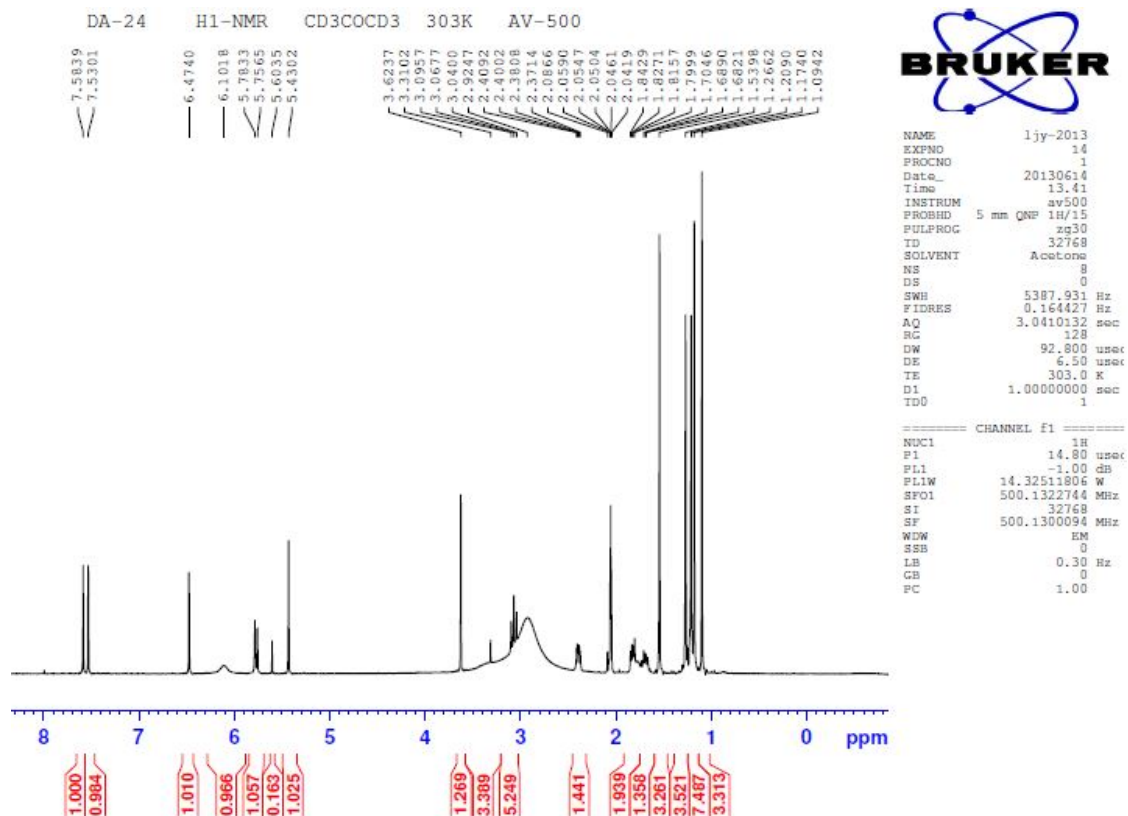

S8.  $^1\text{H}$  NMR spectrum of compound 3 (500 MHz,  $\text{CD}_3\text{COCD}_3$ )



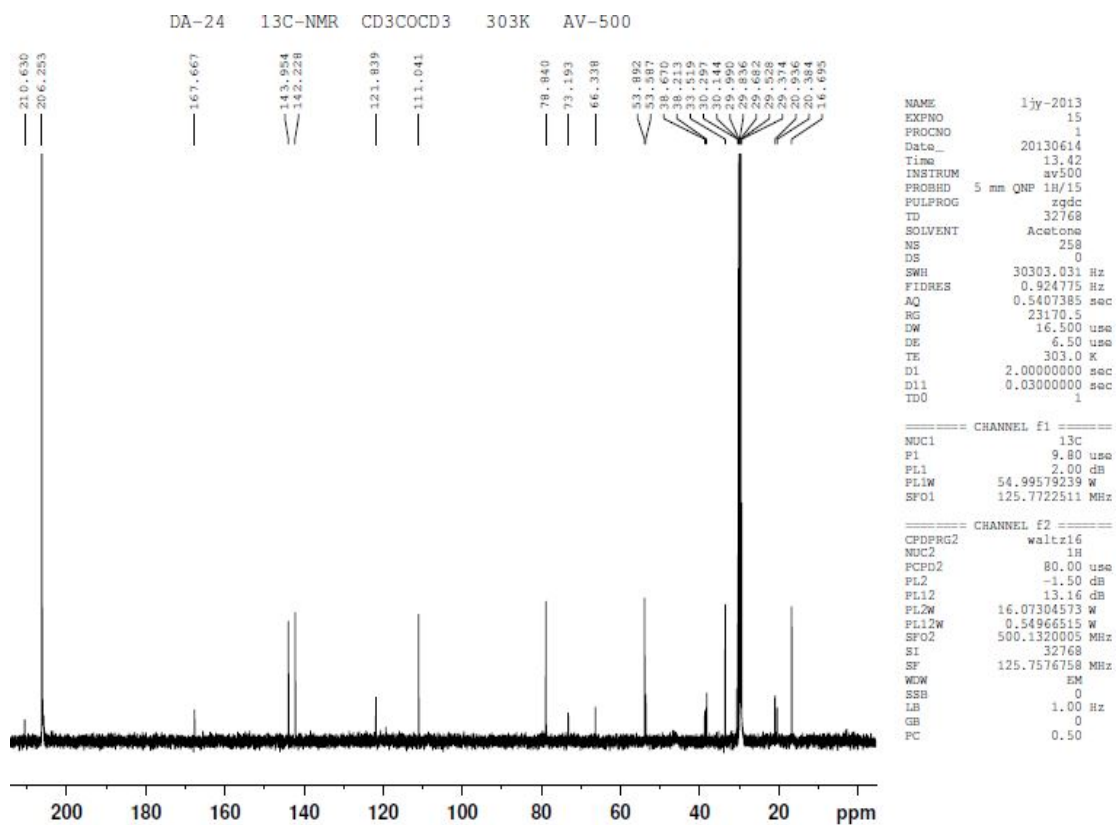

S9.  $^{13}\text{C}$  NMR spectrum of compound **3** (125 MHz,  $\text{CD}_3\text{COCD}_3$ )

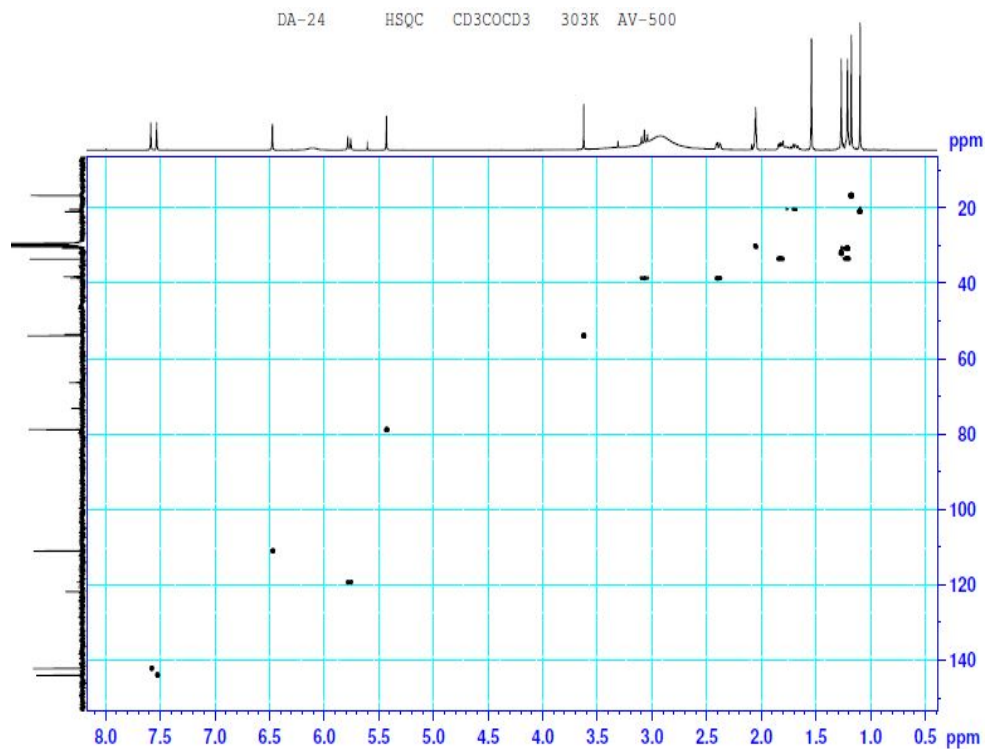

S10. HSQC spectrum of compound **3**



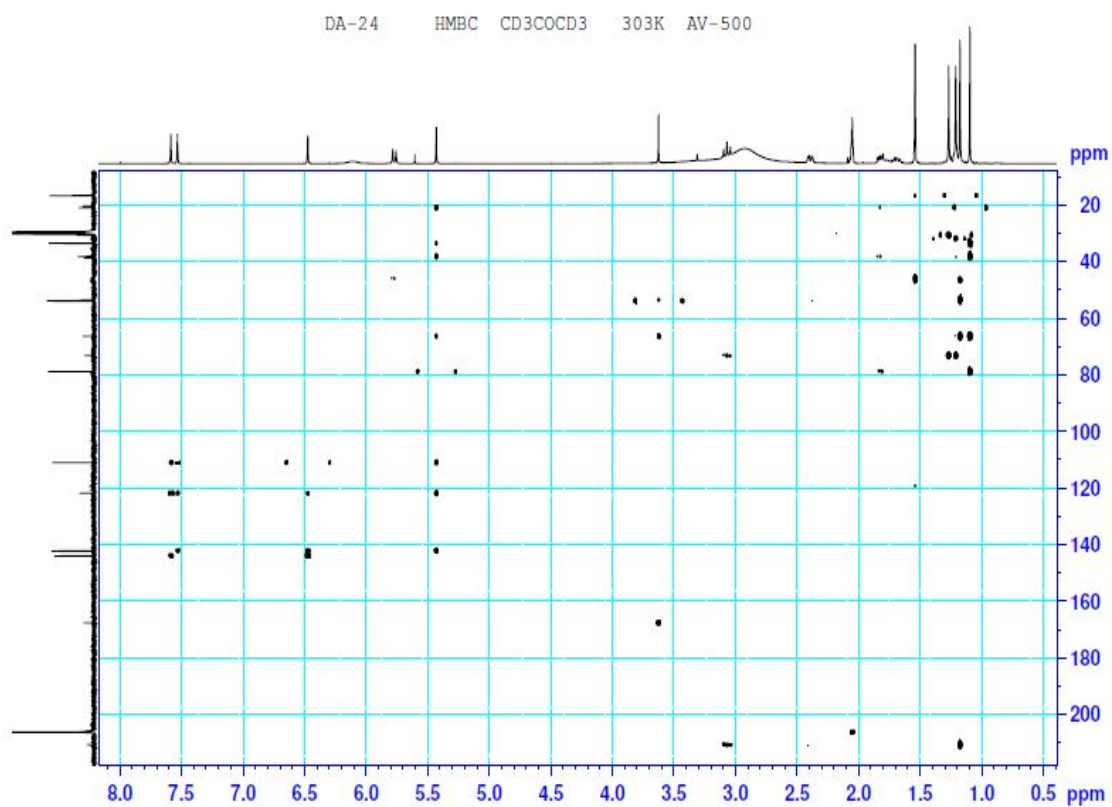

**S11.** HMBC spectrum of compound **3**

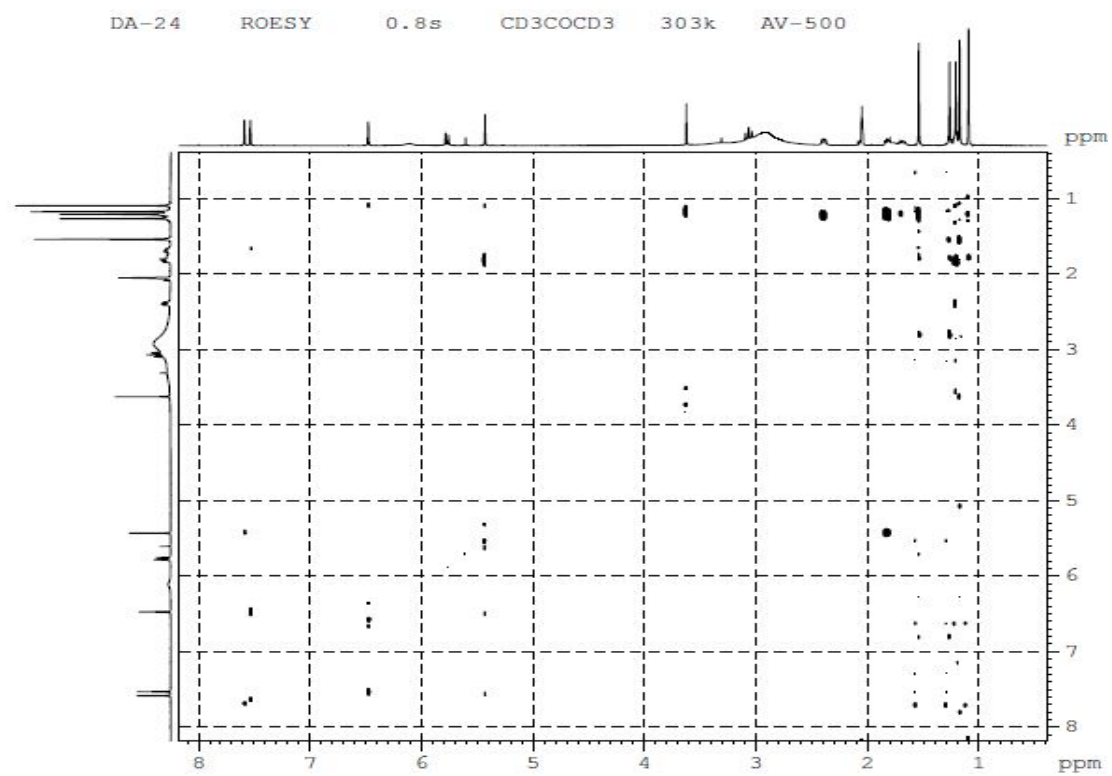

**S12.** ROESY spectrum of compound **3**







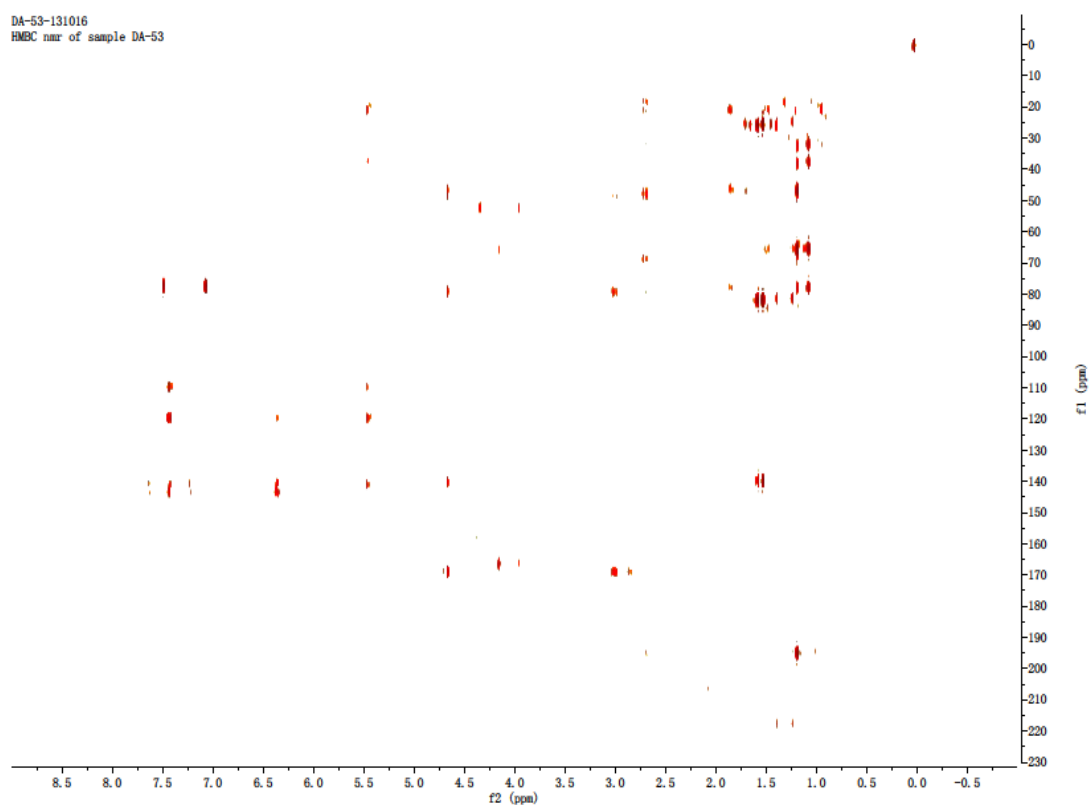

**S19.** HMBC spectrum of compound **5**

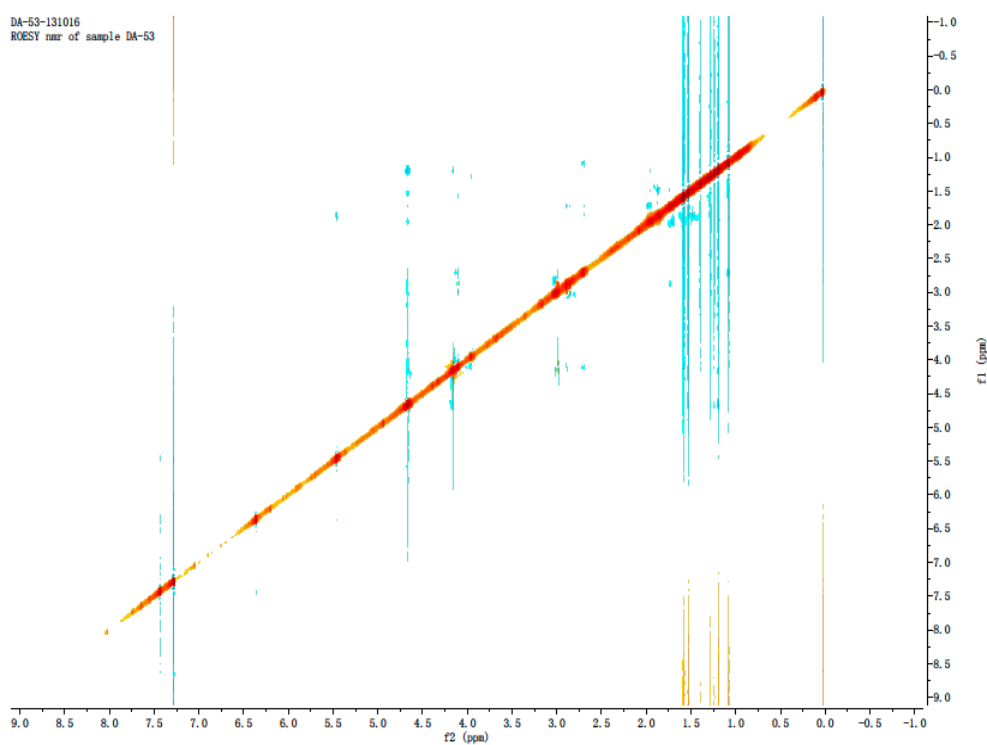

**S20.** ROESY spectrum of compound **5**

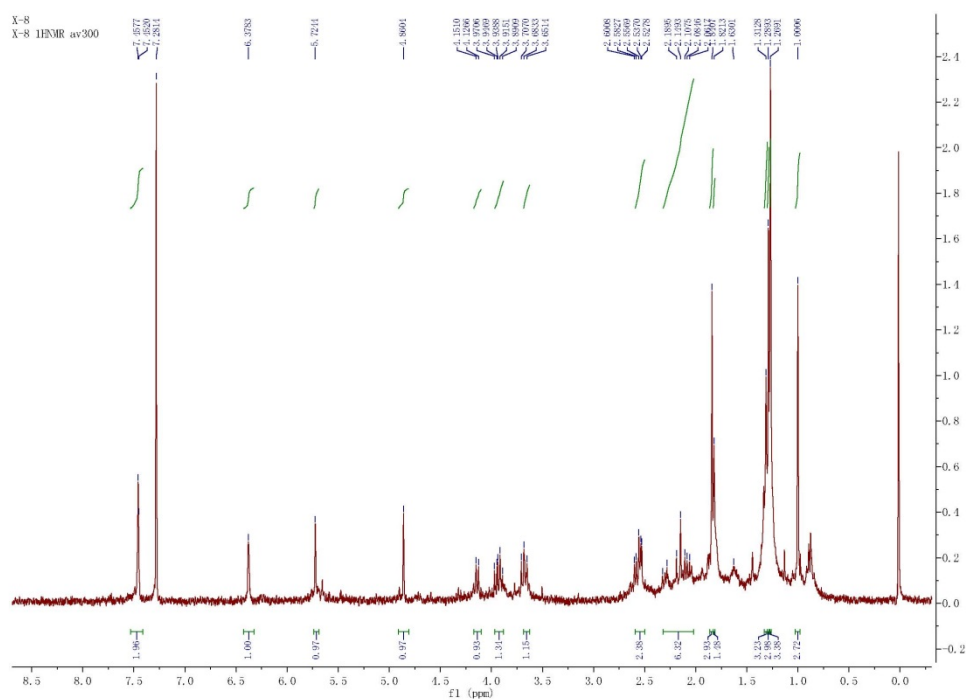

**S21.**  $^1\text{H}$  NMR spectrum of compound **6** (300 MHz,  $\text{CDCl}_3$ )

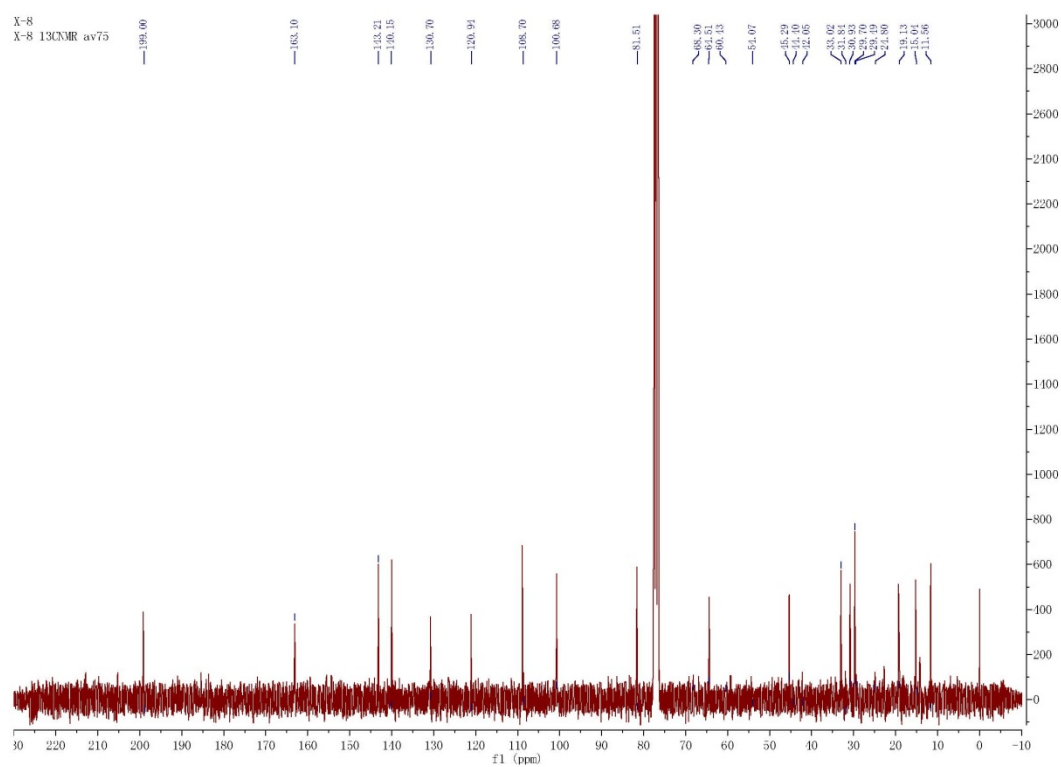

**S22.**  $^{13}\text{C}$  NMR spectrum of compound **6** (75 MHz,  $\text{CDCl}_3$ )

X-8

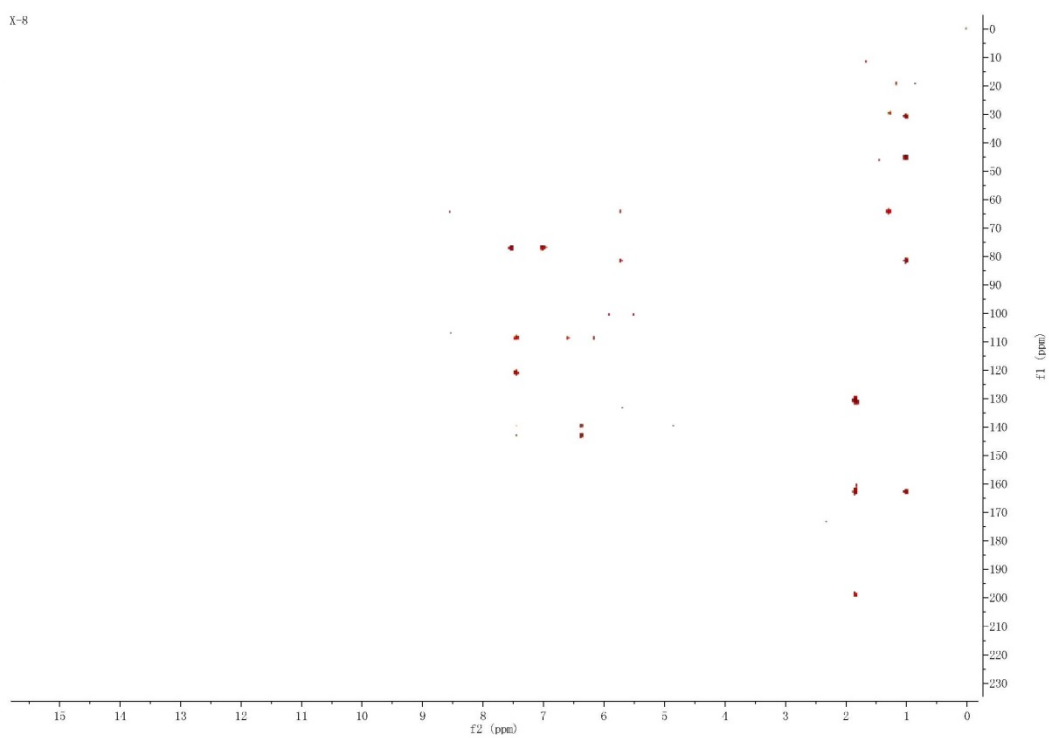

**S23.** HMBC spectrum of compound **7**

X-8

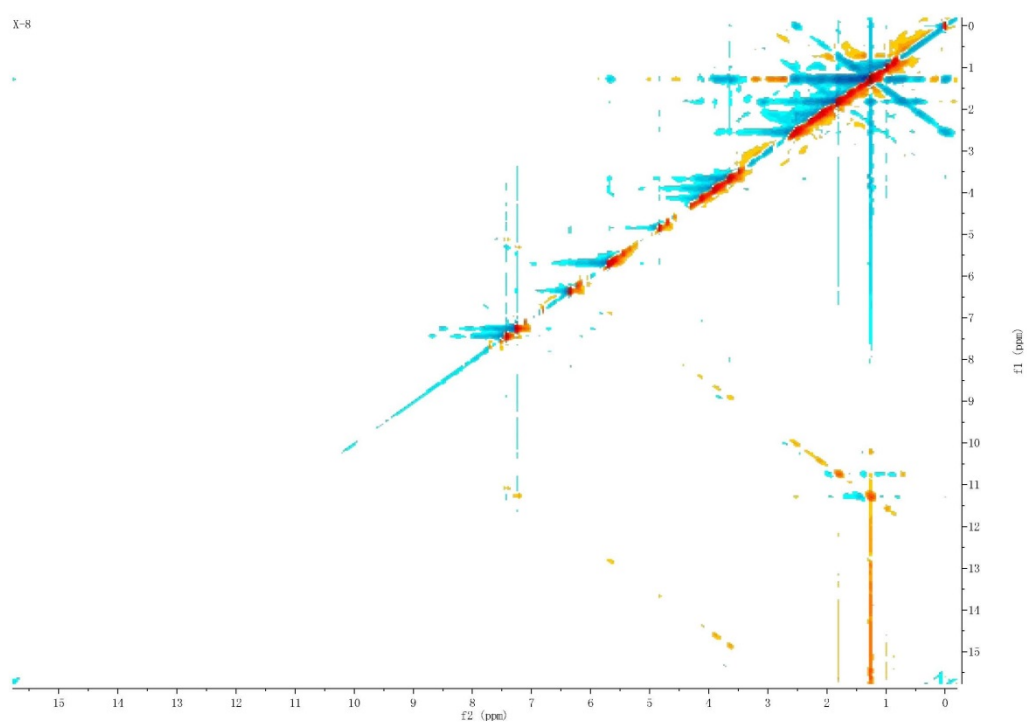

**S24.** ROESY spectrum of compound **6**



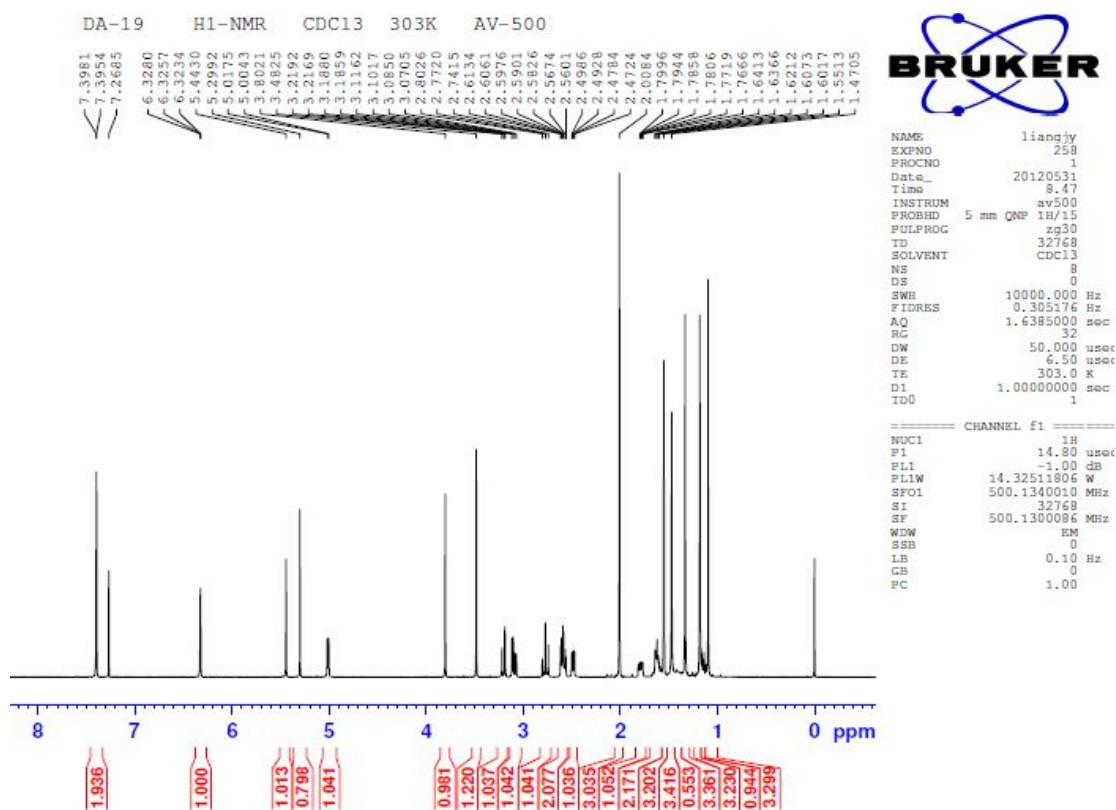

**S25.**  $^1\text{H}$  NMR spectrum of compound **7** (500 MHz,  $\text{CDCl}_3$ )

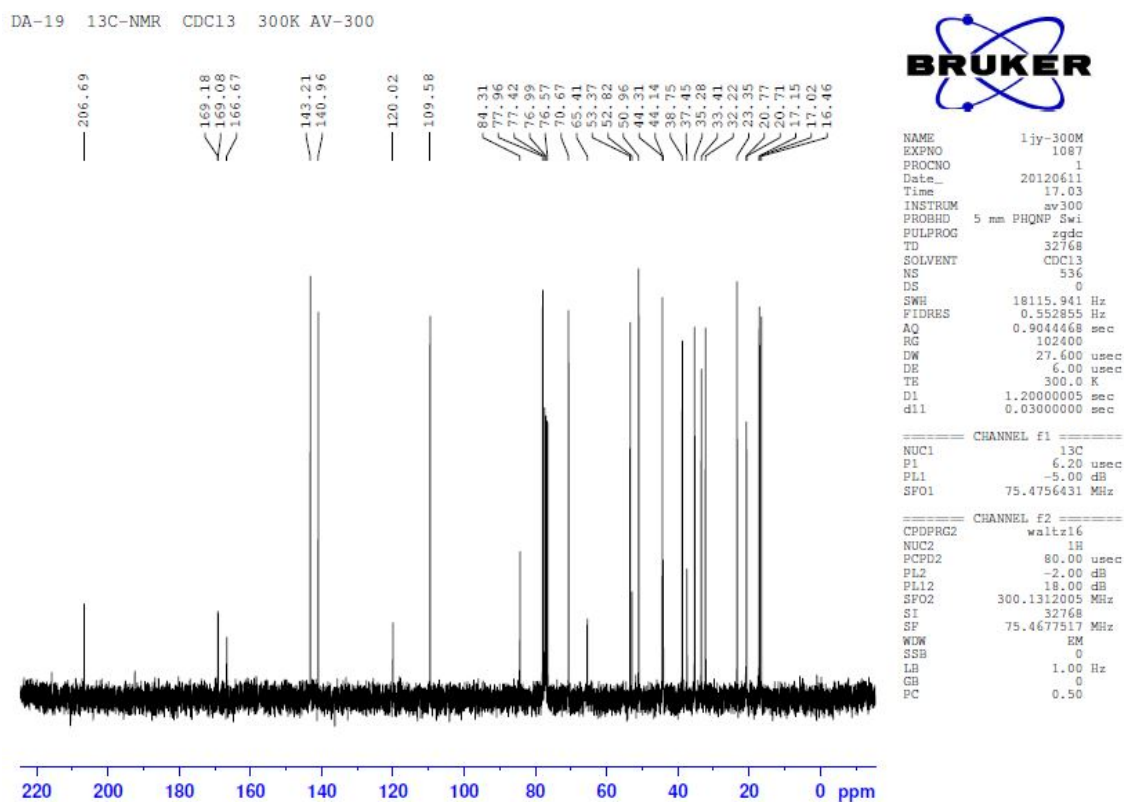

**S26.**  $^{13}\text{C}$  NMR spectrum of compound **7** (125 MHz,  $\text{CDCl}_3$ )

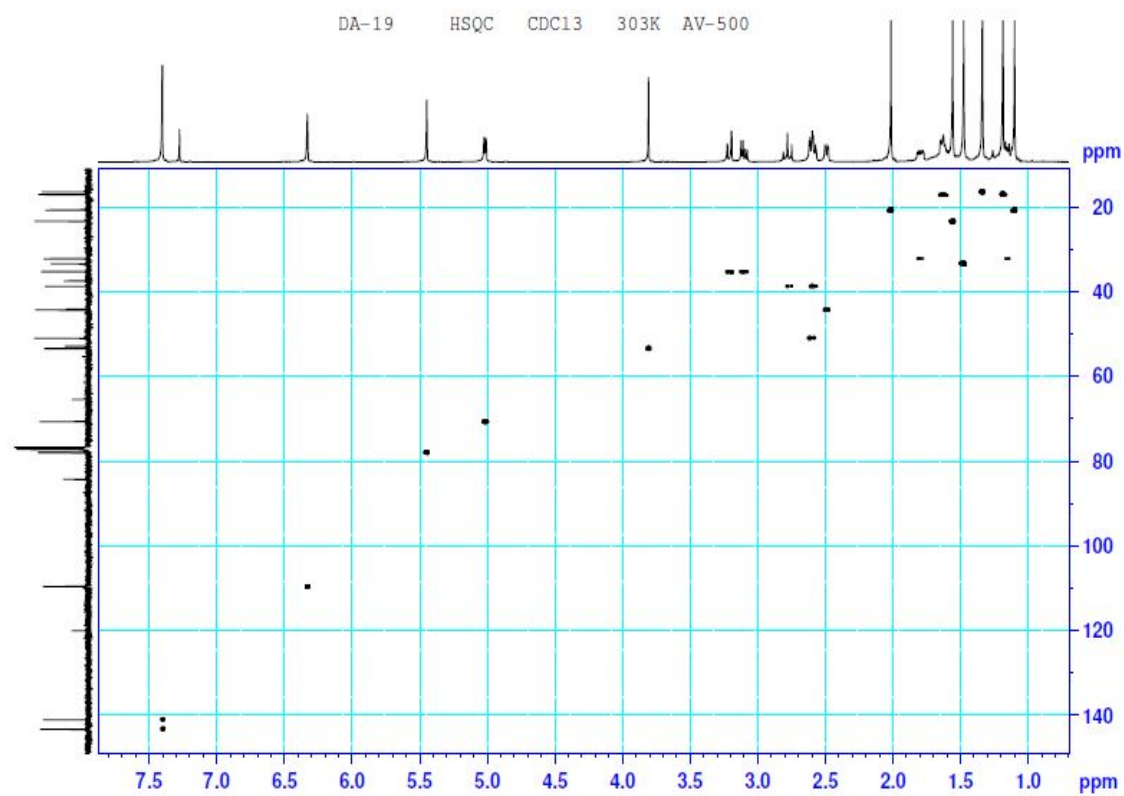

S27. HSQC spectrum of compound 7

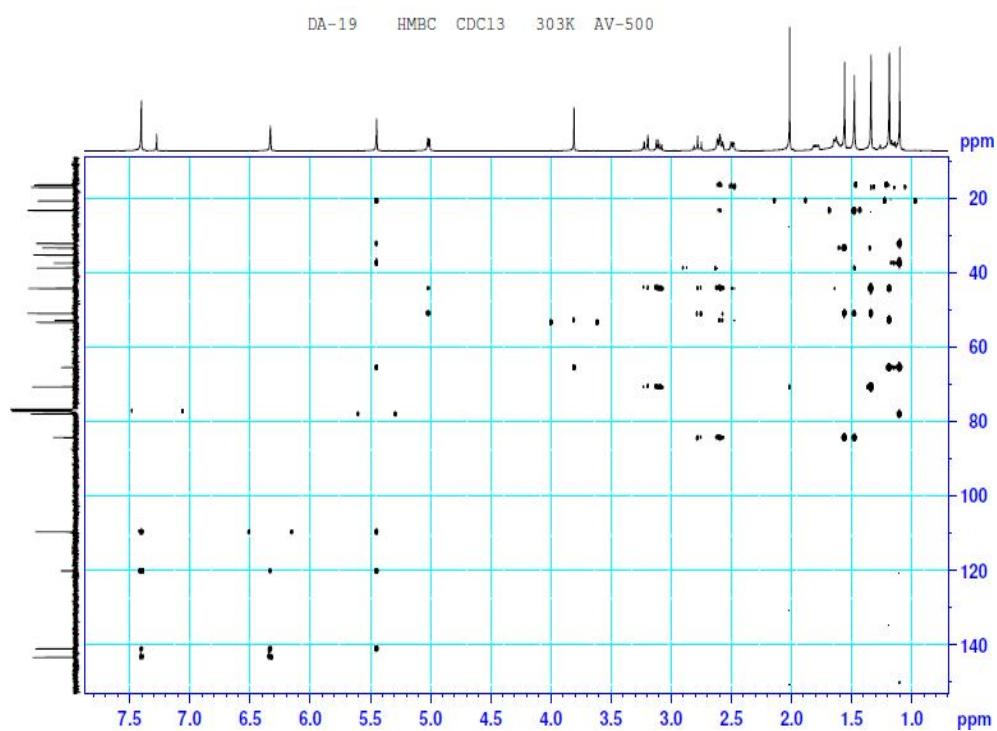

S28. HMBC spectrum of compound 7

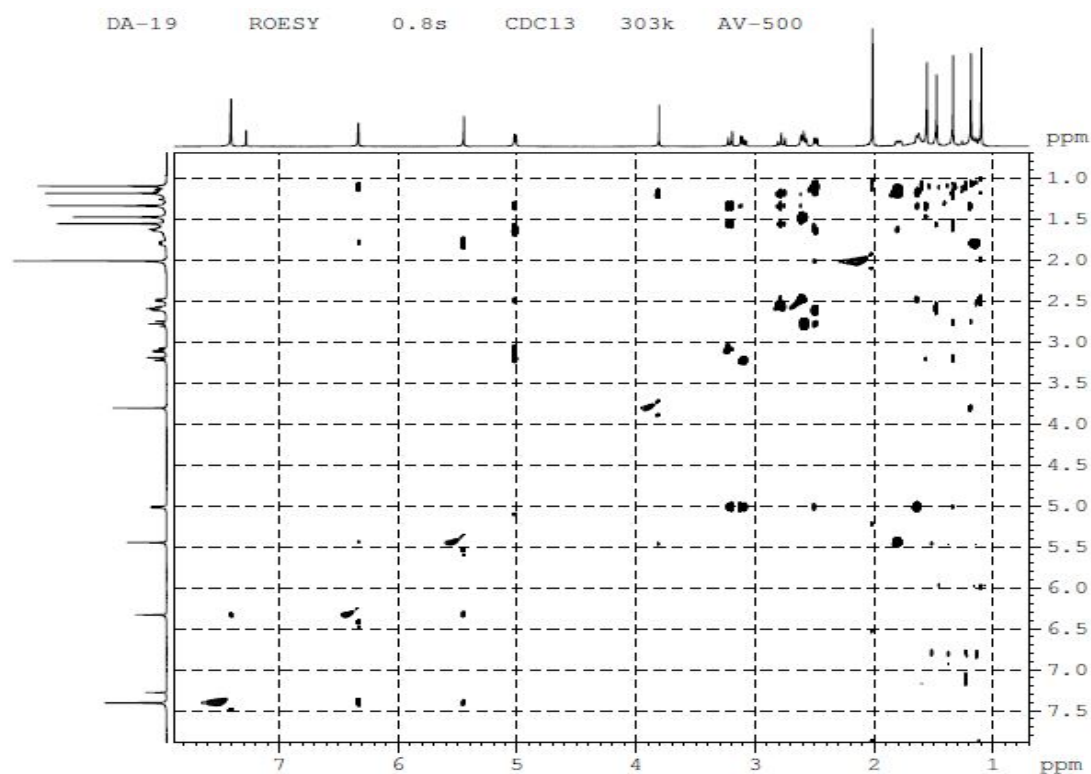

**S29.** ROESY spectrum of compound **7**

DA-35 1H-NMR, CDCL3 303K AV-300

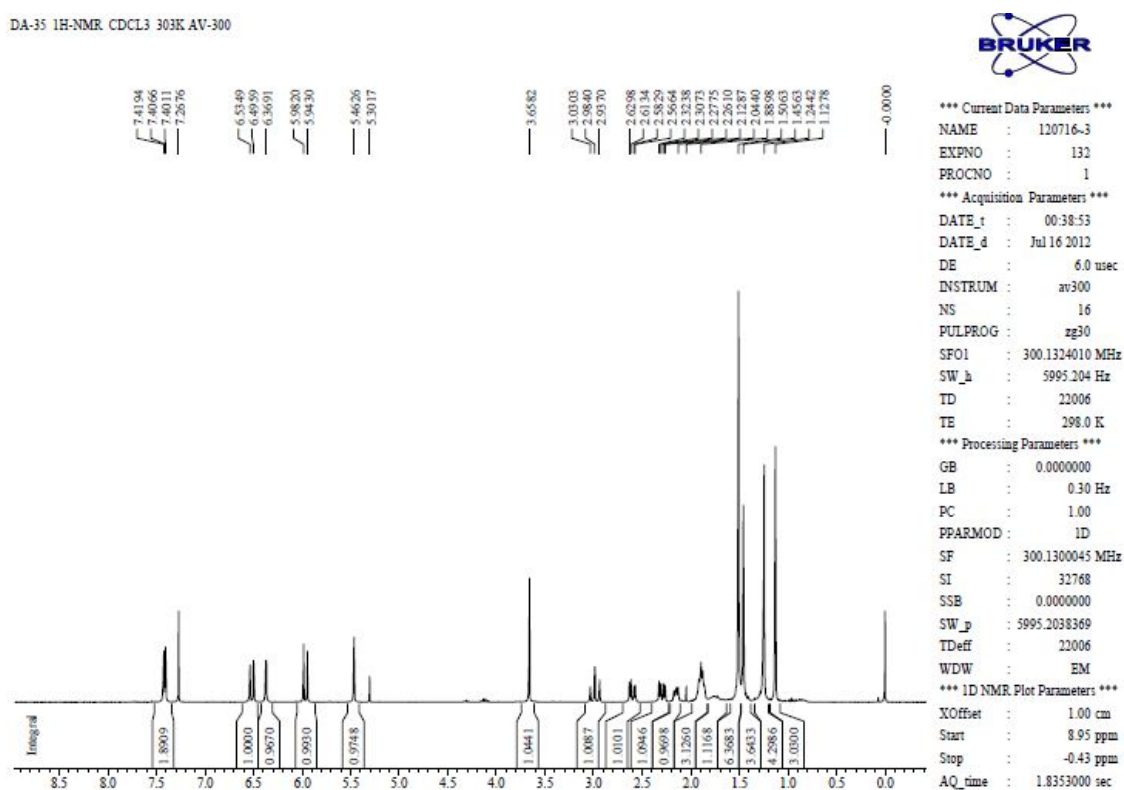

**S30.**  $^1\text{H}$  NMR spectrum of compound **8** (300 MHz,  $\text{CDCl}_3$ )

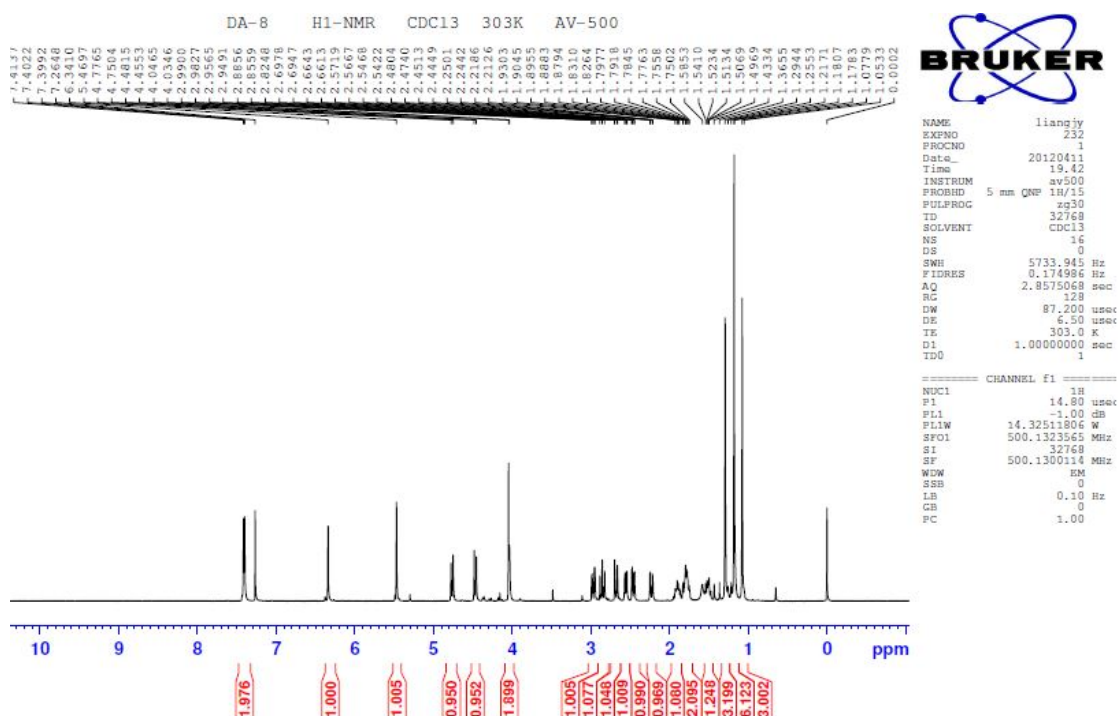

S31.  $^1\text{H}$  NMR spectrum of compound **9** (500 MHz,  $\text{CDCl}_3$ )

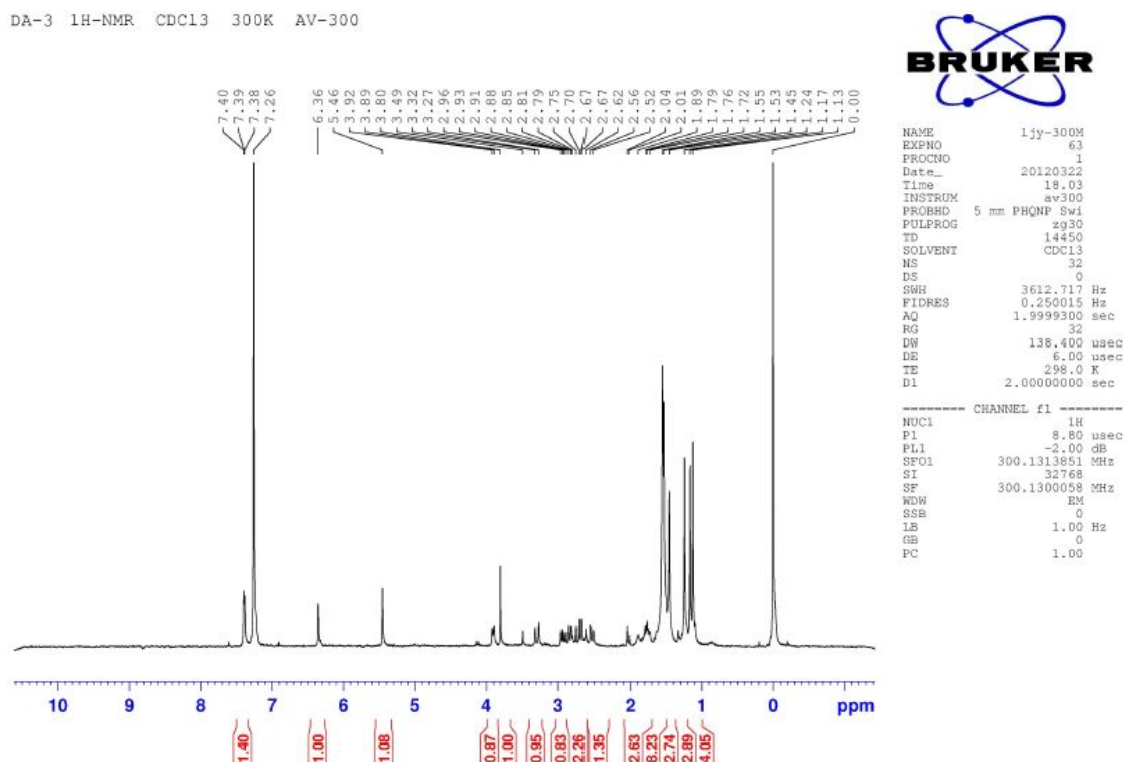

S32.  $^1\text{H}$  NMR spectrum of compound **10** (300 MHz,  $\text{CDCl}_3$ )
